# Supplementary material for: What does it cost to deliver antenatal care in Papua New Guinea? Results from a health system costing and budget impact analysis using cross-sectional data
Source: PubMed Central journal article supplement (PMC11603808; doi:10.1136/bmjopen-2023-080574), 2024-11-27
Supplement: bmjopen-14-11-s001.pdf [file bmjopen-14-11-s001.pdf]

## Supplementary Appendix S1

### WANTAIM Study Group

| <b>Investigator Group</b>        |                                                   |
|----------------------------------|---------------------------------------------------|
| Andrew Vallely                   | Chief Investigator                                |
| William Pomat                    | Co-Chief Investigator                             |
| Michaela Riddell                 | Senior Trial Coordinator                          |
| Alice Mengi                      | Deputy Trial Coordinator                          |
| Steven Badman                    | Laboratory Coordinator                            |
| Lisa Vallely                     | Maternal and Child Health Coordinator             |
| Handan Wand                      | Trial Statistician                                |
| Nicola Low                       | Epidemiologist                                    |
| John Bolnga                      | Medical Expert - Madang                           |
| Delly Babona                     | Medical Expert – East New Britain                 |
| Glen Mola                        | Trial Medical Expert                              |
| Virginia Wiseman                 | Trial Health Economist                            |
| Angela Kelly-Hanku               | Social Research Lead                              |
| Caroline Homer                   | Epidemiologist / Maternal and Child Health Lead   |
| Christopher Morgan               | Health Systems Research Lead                      |
| Stanley Luchters                 | Clinical Epidemiologist                           |
| David Whiley                     | Laboratory Research Lead                          |
| Leanne Robinson                  | Epidemiologist / Malaria Expert                   |
| Lucy Au                          | Site Coordinator – East New Britain               |
| Irene Pukai Gani                 | Site Coordinator – East New Britain               |
| Moses Laman                      | Clinical Epidemiologist / Malaria Expert          |
| Grace Kariwiga                   | Trial Medical Expert                              |
| Pamela Toliman                   | Epidemiologist / Laboratory Researcher            |
| Batura Neha                      | Health Economist                                  |
| Sepehr Tabrizi                   | Laboratory Research Scientist                     |
| Stephen J Rogerson               | Clinical Epidemiologist / Malaria Expert          |
| Suzanne M Garland                | Clinical Epidemiologist and Medical Expert        |
| Rebecca Guy                      | Epidemiologist                                    |
| Rosanna Peeling                  | Epidemiologist                                    |
| John M Kaldor                    | Epidemiologist                                    |
| <b>Trial Administration</b>      |                                                   |
| Kelvin Waukave                   | Financial Controller                              |
| Wilfred Peter                    | Communications Advisor (Madang PHA)               |
| Jacob Morewaya                   | Public Health Advisor (Milne Bay PHA)             |
| Peter Siba                       | Senior Technical Advisor                          |
| Elizabeth Peach                  | Research Manager (Burnet Institute)               |
| Patricia Sengele                 | Administration/Finance Officer (Burnet Institute) |
| <b>East New Britain Province</b> |                                                   |
| Leah Molok                       | HEO/Research Nurse                                |

|                        |                                              |
|------------------------|----------------------------------------------|
| Tessie Clip            | HEO/Research Nurse                           |
| Irene Daniels          | HEO/USS technician                           |
| Crystal Keiwaga        | HEO/USS technician                           |
| Daniel Hosea           | Midwife/Research Nurse                       |
| Augustina Aiarak       | Midwife/Research Nurse                       |
| Lorraine Mua           | Midwife/Research Nurse                       |
| Valentine Russiat      | Laboratory Officer/GeneXpert technician      |
| Anna Davis             | Research Nurse/GeneXpert technician          |
| Biru Subey             | Research Nurse/GeneXpert technician          |
| Misilie Padik          | Research Nurse                               |
| Muria Tangal           | Research Nurse                               |
| Esleen Vovono          | Research Nurse                               |
| Konsetta Malava        | Research Nurse                               |
| Ellen Kavang           | Research Nurse                               |
| Vicky Bayagau Wong     | Research Nurse                               |
| Jermimah Garaen        | Research CHW                                 |
| Laniet Eddie           | Research CHW                                 |
| Johnslyne David        | Research CHW                                 |
| Jermimah Garaaen       | Research CHW                                 |
| Diana Malip            | Research CHW                                 |
| Noel Amada             | Driver                                       |
| Elisha Jordan          | Driver                                       |
| Mosely Viringa         | Driver                                       |
| Cosmos Francis         | Driver (Burnet Institute)                    |
| James Makap            | Driver (Burnet Institute)                    |
| Daniel Amin            | Laboratory Officer (Burnet Institute)        |
| Ruth Fidelis           | Senior Laboratory Officer (Burnet Institute) |
| Tony Rave              | HEO/Community Liaison Officer                |
| Rebecca Anian          | Community Liaison Officer/Admin Officer      |
| Romalus Tavui          | Community Liaison Officer                    |
| John Kamit             | Community Liaison Officer                    |
| Benedictor Mission     | Community Liaison Officer                    |
| Charity Stanley        | Community Liaison Officer                    |
| Grace Baining          | Finance officer (Burnet Institute)           |
| Everlyn Kavang         | HR officer (Burnet Institute)                |
| <b>Madang staff</b>    |                                              |
| Sharon Warel           | Midwife/Research Nurse/USS Technician        |
| Janeth Kulimbao        | Research CHW/USS Technician                  |
| Talitha Manie          | Research Nurse /USS technician               |
| Dupain Singirok        | Snr Research Nurse                           |
| Carolyn Wokias Augusto | Snr Research Nurse/Community Liaison         |
| Eunice Jally           | HEO/Research Nurse                           |
| Maggie Taupa           | Research Nurse                               |
| Regina Enman           | Research Nurse                               |
| Judith Demie           | Research Nurse                               |

|                            |                                                            |
|----------------------------|------------------------------------------------------------|
| Pamela Brea                | Research Nurse                                             |
| Aileen Jeffrey             | Research Nurse                                             |
| Jonathon Warel             | Research Nurse                                             |
| Cornelia Duba              | Laboratory Officer/GeneXpert Technician                    |
| George Kuias               | Research Nurse/GeneXpert Technician                        |
| Beromina Jano              | Research CHW/ GeneXpert Technician                         |
| Michelyn John              | Research CHW/ GeneXpert Technician                         |
| Georgina Sengum            | Research CHW                                               |
| Joyce Soalili              | Research CHW                                               |
| Francesca Buran            | Research CHW                                               |
| Cegatha Tawai              | Research CHW                                               |
| Milda Lasu                 | Research CHW                                               |
| Tia Marie Badem            | Community Liaison Officer                                  |
| Theresa Tivud              | Community Liaison Officer                                  |
| Joseph Yamuna              | Operations Manager                                         |
| Mathilda Saki              | Data Manager                                               |
| Kelly Masil                | Data Manager                                               |
| Lennie Mal                 | Data Entry Officer                                         |
| Yapi Kepea                 | Driver                                                     |
| Paul Romanus               | Driver                                                     |
| Konnie Patrick             | Driver/Community Liaison Officer                           |
| <b>Study Sites</b>         |                                                            |
| Paparatava Health Centre   | Antenatal Clinic, Labour/Postnatal, East New Britain (CHS) |
| Kerevat Rural Hospital     | Antenatal Clinic, Labour/Postnatal, East New Britain (PHA) |
| Warangoi Rural Hospital    | Antenatal Clinic, Labour/Postnatal, East New Britain (PHA) |
| Gelegele Health Centre     | Antenatal Clinic, Labour/Postnatal, East New Britain (PHA) |
| Napapar Health Centre      | Antenatal Clinic, Labour/Postnatal, East New Britain (CHS) |
| St Mary's Vunapope         | Labour/Postnatal, East New Britain (CHS)                   |
| Nonga General Hospital     | Labour/Postnatal, East New Britain (PHA)                   |
| Jomba Clinic               | Antenatal Clinic, Madang (PHA)                             |
| Madang Town Clinic         | Antenatal Clinic, Madang (PHA)                             |
| Alexishafen Health Centre  | Antenatal Clinic, Labour/Postnatal, Madang (CHS)           |
| Mugil Health Centre        | Antenatal Clinic, Labour/Postnatal, Madang (CHS)           |
| Yaguam Rural Hospital      | Antenatal Clinic, Labour/Postnatal, Madang (LHS)           |
| Madang Provincial Hospital | Labour/Postnatal, Madang (PHA)                             |
