# Supplementary material for: What does it cost to deliver antenatal care in Papua New Guinea? Results from a health system costing and budget impact analysis using cross-sectional data
Source: PubMed Central journal article supplement (PMC11603808; doi:10.1136/bmjopen-2023-080574), 2024-11-27
Supplement: bmjopen-14-11-s004.pdf [file bmjopen-14-11-s004.pdf]

Supplementary Table 1: Service statistics per province (2019)

| Province                             | Total number<br>of pregnancies<br>(N) | N (%) of pregnant women attending<br>antenatal clinic |                        |
|--------------------------------------|---------------------------------------|-------------------------------------------------------|------------------------|
|                                      |                                       | At least once                                         | At least four<br>times |
| Manus                                | 1843                                  | 1175 (63.8%)                                          | 808 (43.8%)            |
| Gulf                                 | 8464                                  | 2727 (32.2%)                                          | 1126 (13.3%)           |
| Oro                                  | 9576                                  | 2949 (30.8%)                                          | 1456 (15.2%)           |
| New Ireland                          | 7167                                  | 3847 (53.7%)                                          | 2289 (31.9%)           |
| Western                              | 12146                                 | 3985 (32.8%)                                          | 1762 (14.5%)           |
| Central                              | 10431                                 | 4152 (39.8%)                                          | 1638 (15.7%)           |
| Jiwaka                               | 11686                                 | 4782 (40.9%)                                          | 2193 (18.8%)           |
| West Sepik                           | 12834                                 | 4887 (38.1%)                                          | 2109 (16.4%)           |
| Hela                                 | 10391                                 | 5229 (50.3%)                                          | 3203 (30.8%)           |
| Chimbu                               | 11137                                 | 5378 (48.3%)                                          | 2751 (24.7%)           |
| Autonomous Region of<br>Bougainville | 12409                                 | 6016 (48.5%)                                          | 2763 (22.3%)           |
| Milne Bay                            | 12762                                 | 6851 (53.7%)                                          | 4171 (32.7%)           |
| Southern Highlands                   | 23789                                 | 7083 (29.8%)                                          | 3435 (14.4%)           |
| West New Britain                     | 12233                                 | 7108 (58.1%)                                          | 3743 (30.6%)           |
| Enga                                 | 15923                                 | 7303 (45.9%)                                          | 2298 (14.4%)           |
| East Sepik                           | 22476                                 | 7687 (34.2%)                                          | 2784 (12.4%)           |
| East New Britain                     | 13234                                 | 8158 (61.6%)                                          | 4176 (31.6%)           |
| Western Highlands                    | 14380                                 | 8546 (59.4%)                                          | 4295 (29.9%)           |
| Madang                               | 27403                                 | 10907 (39.8%)                                         | 5045 (18.4%)           |
| Eastern Highlands                    | 23147                                 | 12151 (52.5%)                                         | 6608 (28.5%)           |
| Morobe                               | 30746                                 | 14372 (46.7%)                                         | 5991 (19.5%)           |
| National Capital<br>District         | 26014                                 | 14560 (56.0%)                                         | 7531 (28.9%)           |
