# Supplementary material for: What does it cost to deliver antenatal care in Papua New Guinea? Results from a health system costing and budget impact analysis using cross-sectional data
Source: PubMed Central journal article supplement (PMC11603808; doi:10.1136/bmjopen-2023-080574), 2024-11-27
Supplement: bmjopen-14-11-s005.pdf [file bmjopen-14-11-s005.pdf]

## Supplementary Appendix S2

### Equations accompanying the Costing approach

| Equations deriving the annual health system cost for antenatal care, the cost of scaling up to universal coverage and the expected cost of the eight-visit model | Equation Number | Notes                                                                                                                                                                                                                     |
|------------------------------------------------------------------------------------------------------------------------------------------------------------------|-----------------|---------------------------------------------------------------------------------------------------------------------------------------------------------------------------------------------------------------------------|
| <b>Capital Costs:</b>                                                                                                                                            |                 |                                                                                                                                                                                                                           |
| $C = (E + I)$                                                                                                                                                    | EQ1             | C: Capital costs;<br>E: Cost of equipment; and<br>I: Cost of infrastructure.                                                                                                                                              |
| <b>Recurrent Costs for the first and follow-up antenatal clinic visits</b>                                                                                       |                 |                                                                                                                                                                                                                           |
| $R_1 = (H + M_1 + O)$                                                                                                                                            | EQ2a            | H: Cost of human resources;<br>O: Cost of overheads;<br>M <sub>1</sub> : Cost of medicines and medical Supplies used during the first visit; and<br>R <sub>1</sub> : Recurrent costs for the first antenatal clinic visit |
| $R_2 = (H + M_2 + O)$                                                                                                                                            | EQ2b            | M <sub>2</sub> : Cost of medicines and medical supplies used during a follow-up visit; and<br>R <sub>2</sub> : Recurrent costs for the follow-up antenatal clinic visit                                                   |
| <b>Cost of the first and follow-up antenatal clinic visits</b>                                                                                                   |                 |                                                                                                                                                                                                                           |
| $ANC_1 = C + R_1$                                                                                                                                                | EQ3a            | ANC <sub>1</sub> : Cost of the first antenatal care visit                                                                                                                                                                 |
| $ANC_2 = C + R_2$                                                                                                                                                | EQ3b            | ANC <sub>2</sub> : Cost of the follow-up antenatal care visit                                                                                                                                                             |
| <b>Cost of four antenatal clinic visits</b>                                                                                                                      |                 |                                                                                                                                                                                                                           |
| $fANC = ANC_1 + 3(ANC_2)$                                                                                                                                        | EQ4             | fANC: Cost of four antenatal clinic visits (also called focused antenatal care)                                                                                                                                           |

|                                              |     |                                                                                                                             |
|----------------------------------------------|-----|-----------------------------------------------------------------------------------------------------------------------------|
| Annual health system cost for antenatal care |     |                                                                                                                             |
| $fANC \times U$                              | EQ5 | U: antenatal care utilization (number of pregnant women visiting antenatal clinic at least four times throughout pregnancy) |

|                                                                                     |     |                                                                                                                                                                                                                       |
|-------------------------------------------------------------------------------------|-----|-----------------------------------------------------------------------------------------------------------------------------------------------------------------------------------------------------------------------|
| Expected cost of universal coverage of four antenatal clinic visits <sup>*,**</sup> |     |                                                                                                                                                                                                                       |
| $UC = (1(R_1) + 3(R_2)) \times P$                                                   | EQ6 | UC: Expected financial cost of universal coverage of four antenatal clinic visits (or of focused antenatal care); P: population of pregnant women<br>*: only includes financial costs<br>**: costs are not discounted |

|                                                                                                                |     |                                                                                                                                                              |
|----------------------------------------------------------------------------------------------------------------|-----|--------------------------------------------------------------------------------------------------------------------------------------------------------------|
| Expected cost of universal coverage of eight antenatal clinic visits or budget impact analysis <sup>*,**</sup> |     |                                                                                                                                                              |
| $BIA = (1(R_1) + 7(R_2)) \times P$                                                                             | EQ7 | BIA: budget impact analysis of making eight antenatal clinic visits throughout pregnancy<br>*: only includes financial costs<br>**: costs are not discounted |
